# Supplementary material for: Predicting internal cell fluxes at sub-optimal growth
Source: PubMed Central journal article supplement (PMC4397736; doi:10.1186/s12918-015-0153-3), 2015-04-03
Supplement: 12918_2015_153_MOESM7_ESM.pdf [file 12918_2015_153_MOESM7_ESM.pdf]

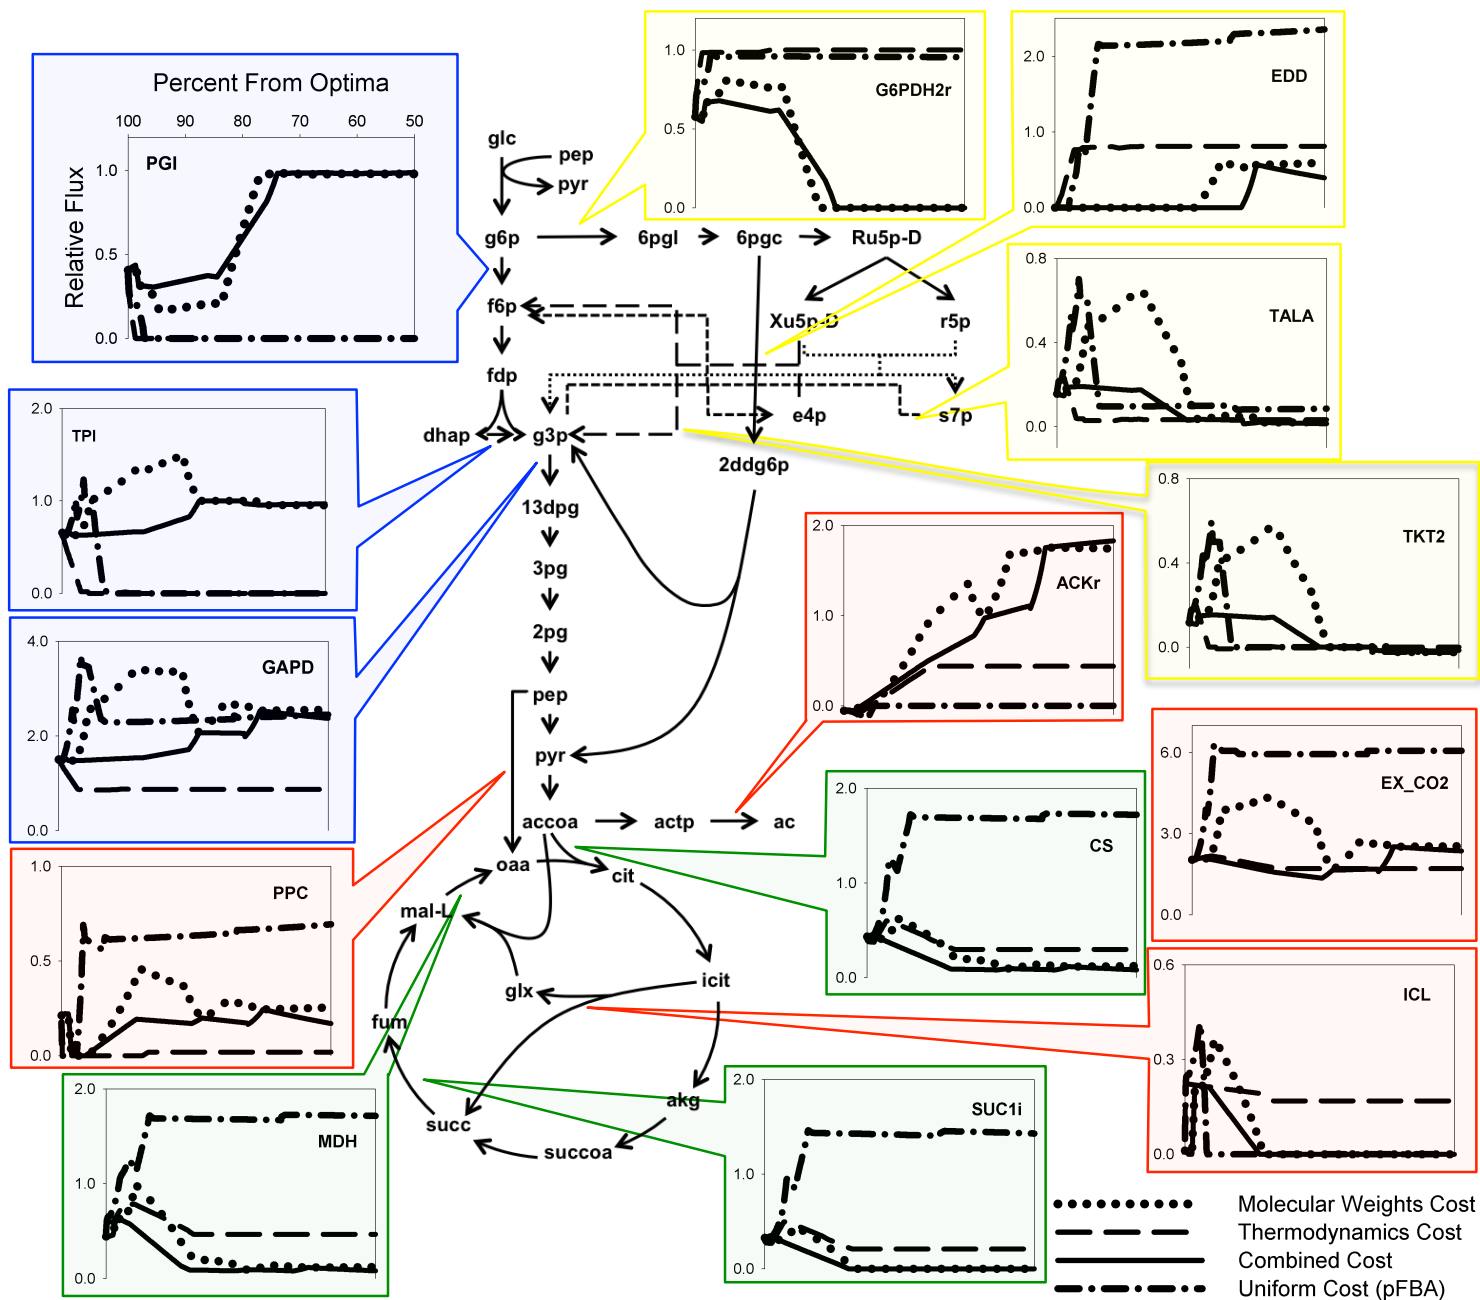

**SI Figure 2:** Comparison between all four costs: (1) molecular weights only, (2) thermodynamic penalty only, (3) combination of molecular weight and thermodynamic penalty and (4) uniform costs. While the implementation of molecular weights and thermodynamic values provide constantly changing metabolic profiles, the implementation of a uniform cost quickly converges to a unique metabolic profile.
