# Supplementary material for: Predicting internal cell fluxes at sub-optimal growth
Source: PubMed Central journal article supplement (PMC4397736; doi:10.1186/s12918-015-0153-3), 2015-04-03
Supplement: 12918_2015_153_MOESM9_ESM.pdf [file 12918_2015_153_MOESM9_ESM.pdf]

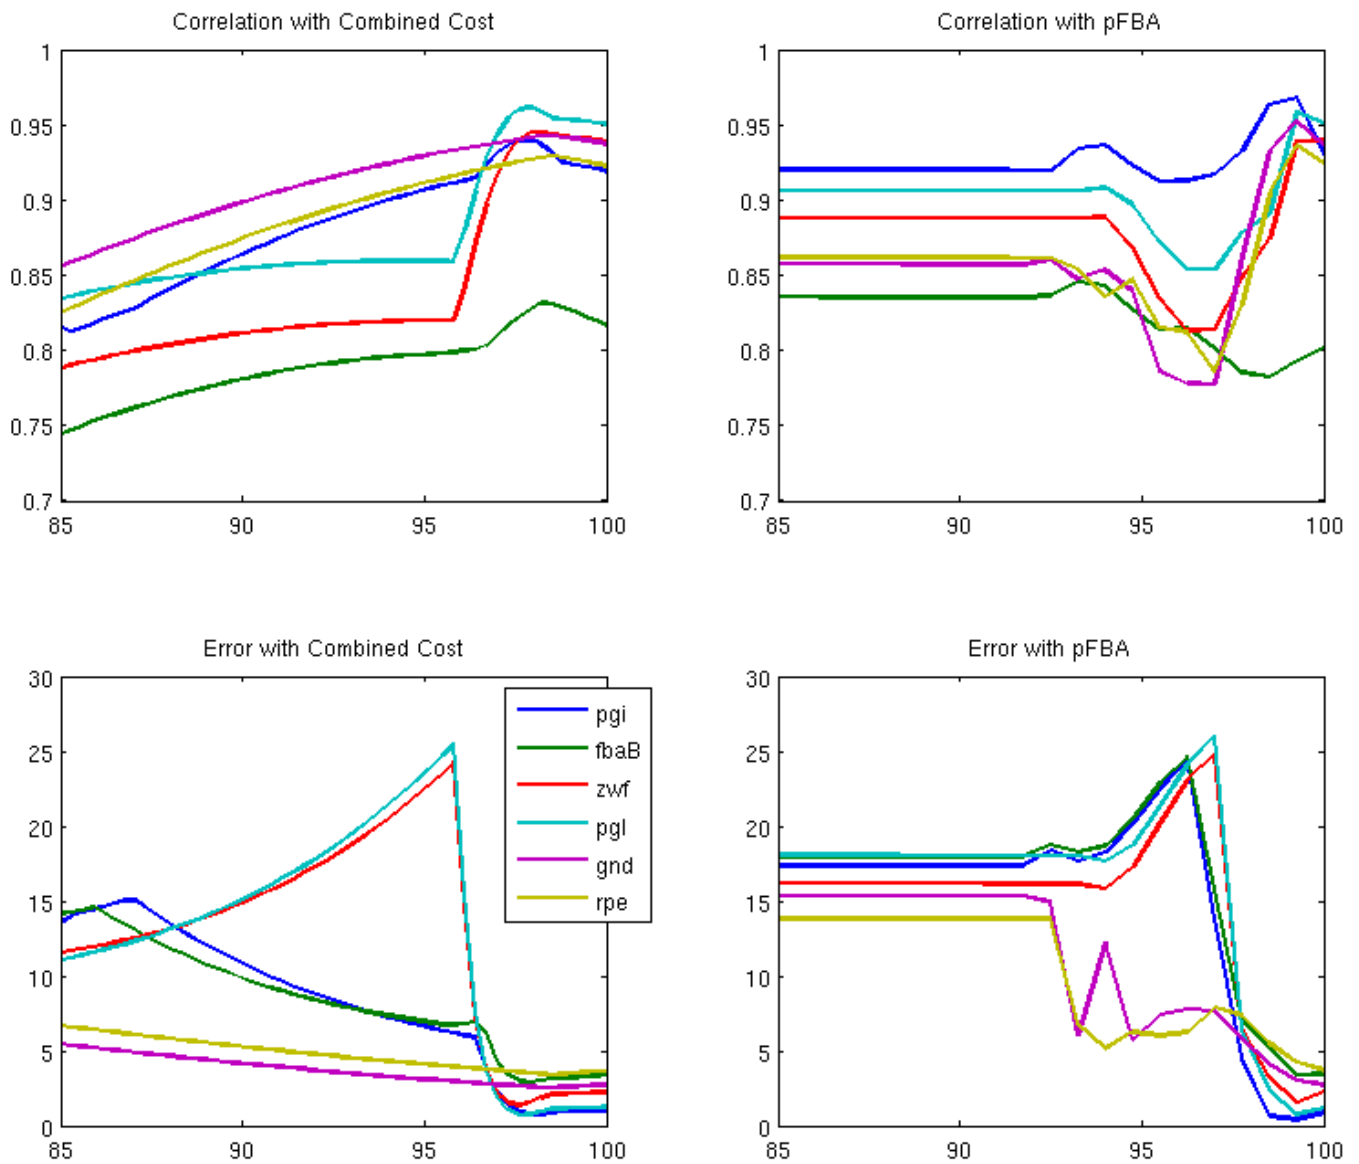

**SI figure 4:** Correlation and sum of squared error between simulated values and MFA experimental fluxes for six knockout strains by Ishii et. al., using both the combined and uniform costs. The same 19 reactions included in **SI figure 2** have been used in this figure. By using a combined cost, cost-optimal simulations present similar correlation and error in a sub-optimal space from 95% to maximal growth.
